# Supplementary material
Source: HighWire-hosted journal article supplement (https://bmjopen.bmj.com/content/9/3/e025936)
Supplement: inline-supplementary-material-1 [file inline-supplementary-material-1.pdf]

## Appendix I. List of Abstracts (Author, Titles, Investigator Information) Included

| # | Title                                                                                                                                        | Investigator        | Investigator Degree | Number of Co-Investigators | Institution                                               | Institution Location        |
|---|----------------------------------------------------------------------------------------------------------------------------------------------|---------------------|---------------------|----------------------------|-----------------------------------------------------------|-----------------------------|
| 1 | Should all patients be under intensive treatment?                                                                                            | Wenwen Zhang        |                     | 0                          | Takeda Pharmaceuticals                                    | Cambridge, MA United States |
| 2 | Individual patient data from SPRINT modeled for benefit harm balance demonstrates equivalence for blood pressure targets of 120 and 140 mmHg | Hélène Aschmann     |                     | 0                          | University of Zurich                                      | Zurich, ZH Switzerland      |
| 3 | Individualizing treatment choices in SPRINT trial                                                                                            | João Pedro Ferreira | MD, PhD             | 2                          | Centre Hospitalier Universitaire de Nancy                 | Ludres, 54 France           |
| 4 | Personalized antihypertensive therapy: using individual variation in population-level statistics to guide clinical decisions                 | Anish Patnaik       |                     | 3                          | McGovern Medical School                                   | Austin, TX United States    |
| 5 | To Treat Intensively or Not – Individualized Decision Making Support Tool                                                                    | Noa Dagan           | MD, MPH             | 0                          | Clalit Research Institute                                 | Tel Aviv, TA Israel         |
| 6 | A Machine-Learning Model for Personalized Trial Data Exploration                                                                             | Jochen Lennerz      | MD, PhD             | 2                          | Massachusetts General Hospital and Harvard Medical School | MA, United States           |
| 7 | Clinical Prediction Scores of Benefit and Harm from Intensive Blood Pressure Management                                                      | Jaejin An           | BPharm, PhD         | 1                          | Western University of Health Sciences College of Pharmacy | Pomona, CA United States    |
| 8 | Blood pressure-lowering treatment based on cardiovascular risk compared with systolic blood pressure                                         | Johan Sundstrom     | MD PhD              | 0                          | Uppsala University                                        | Uppsala, C Sweden           |
| 9 | Uplift Modeling to Personalize Intensive Blood Pressure Control                                                                              | Francis Wilson      | MD MSCE             | 0                          | Yale School of Medicine                                   | New Haven, CT United States |

|    |                                                                                                                                          |                   |           |    |                                               |                             |
|----|------------------------------------------------------------------------------------------------------------------------------------------|-------------------|-----------|----|-----------------------------------------------|-----------------------------|
| 10 | Multivariate analysis enables personalized prediction of adverse heart and kidney outcomes                                               | Gel Dinstag       |           | 2  | Tel Aviv                                      | Tel Aviv, TA Israel         |
| 11 | Risk-Benefit Assessment of Intensive Blood-Pressure Control                                                                              | Mikko Venäläinen  | MSc       | 3  | CompBiomedTurku                               | Turku, 19 Finland           |
| 12 | Exploring heterogeneous treatment effects for stratified blood pressure treatment                                                        | Ludovic Trinquart |           | 1  | BUSPH Biostatistics                           | Boston, CA United States    |
| 13 | Development and Validation of a Clinical Decision Score to Maximize Benefit and Minimize Harm from Intensive Blood Pressure Treatment    | Sanjay Basu       | MD, PhD   | 5  | Stanford University                           | Stanford, CA United States  |
| 14 | Personalized Balance of Benefits and Risks of Hypertension Treatment                                                                     | Lin Li            |           | 1  | Biostat Solutions, Inc.                       | Rockville, MD United States |
| 15 | The Treatment Effect of Intensive Blood Pressure Lowering May Follow an Inverted U-shaped Curve Related to Baseline Cardiovascular Risk  | Marco Huesch      | MBBS, PhD | 0  | Penn State's Milton S. Hershey Medical Center | Hershey, PA United States   |
| 16 | Individualizing SPRINT. Going Beyond the Crowd                                                                                           | Nicole Jaspers    | MD        | 5  | UMC Utrecht                                   | Utrecht, UT Netherlands     |
| 17 | Identification of patients with high blood pressure who would benefit from intensive treatment                                           | Yang Xie          | PhD, MD   | 11 | UT Southwestern Medical Center                | Dallas, TX United States    |
| 18 | Estimating personalized responses to lower systolic blood pressure targets: a machine learning-based causal analysis of the SPRINT Trial | Aron Baum         | PhD       | 2  | Icahn School of Medicine at Mount Sinai       | New York, NY United States  |
| 19 | Personalized blood pressure therapy in hypertensive patients: an analysis of the SPRINT trial                                            | Jan van den Brand | PhD       | 0  | Radboud University Medical Center             | Nijmegen, GE Netherlands    |
| 20 | Features that Predict Poor Outcomes in Hypertensive Non-Diabetic Patients – What Matters Most?                                           | Ronilda Lacson    | MD, PhD   | 5  | Brigham and Women's Hospital                  | Boston, MA United States    |

|    |                                                                                                                                          |                    |         |   |                                                                          |                                  |
|----|------------------------------------------------------------------------------------------------------------------------------------------|--------------------|---------|---|--------------------------------------------------------------------------|----------------------------------|
| 21 | Identifying Patients Who Do Not Benefit from Intensive Blood-Pressure Control in the Systolic Blood Pressure Intervention Trial (SPRINT) | David Cheng        |         | 0 | Harvard School of Public Health                                          | Boston, MA United States         |
| 22 | Using Machine Learning to Personalize Blood Pressure Treatment                                                                           | Kaveh Danesh       |         | 0 | University of California, Berkeley                                       | Berkeley, CA United States       |
| 23 | Individualizing benefit and harm of intensive vs standard blood pressure control: an analysis of SPRINT data                             | Jacob Udell        | MD, MPH | 0 | University of Toronto                                                    | Toronto, Canada                  |
| 24 | Machine learning identifies hypertension patients who do not benefit from intensive treatment                                            | Ljubomir Buturovic |         | 1 | Clinical Persona Inc.                                                    | East Palo Alto, CA United States |
| 25 | Identifying a subgroup with a favorable benefit and risk balance under the intensive treatment                                           | Yan Sun            |         | 1 | Abbvie Inc                                                               | Lake Bluff, IL United States     |
| 26 | Balancing Benefit and Harm of Intensive Antihypertensive Therapy                                                                         | Maria Koh          |         | 5 | Institute for Clinical Evaluative Sciences                               | Toronto, ON Canada               |
| 27 | Development of a Prediction Rule for Benefit and Harm of Intensive Blood Pressure Lowering: The SPRINT Score                             | Manan Pareek       | MD, PhD | 3 | Odense University Hospital                                               | Odense, 83 Denmark               |
| 28 | Systolic Blood Pressure Intervention Trial (SPRINT) Selection Tool                                                                       | Janine Bauman      | BSN     | 1 | The HOLMES (Health Outcomes Linkage with Medical Electronic System) Team | Cleveland, OH United States      |
| 29 | Prediction Risk Factors for significant eGFR decrease in patients without CKD, and a Possible Point System                               | Fei Tang           | PhD     | 0 | University of Miami                                                      | Miami, FL United States          |

## Appendix II. Case Study Comparisons

### Case 1 – High CV Risk Patient

| Risk Calculation from Web/App Tools or Equation Provided |                                            |                                                                                  |                                         |                                             |                                      |                                          |                                           |                                        |                                         |                                         |                                       |                                                       |                                                                                                      |
|----------------------------------------------------------|--------------------------------------------|----------------------------------------------------------------------------------|-----------------------------------------|---------------------------------------------|--------------------------------------|------------------------------------------|-------------------------------------------|----------------------------------------|-----------------------------------------|-----------------------------------------|---------------------------------------|-------------------------------------------------------|------------------------------------------------------------------------------------------------------|
| ID                                                       | Efficacy Outcome                           | Safety Outcome                                                                   | Efficacy and Safety Outcomes Combined   | No. of Variables Used to Calculate the Risk | Time When Risk Calculated (in years) | AR of Efficacy from Standard Therapy (%) | AR of Efficacy from Intensive Therapy (%) | AR of Safety from Standard Therapy (%) | AR of Safety from Intensive Therapy (%) | ARR of Efficacy (Standard-Intensive, %) | ARI of Safety (Intensive-Standard, %) | Net Benefit (Benefit-Harm) from Intensive Therapy (%) | Interpretation/Recommendation for Intensive Therapy (Based on cutoff provided or NNH/NNT calculated) |
| 6                                                        | -                                          | -                                                                                | Assume composite SPRINT and SAE outcome | 5                                           | Not Specified                        | 0.05                                     | 0.06                                      | 0.56                                   | 0.64                                    |                                         |                                       |                                                       | No specific recommendation is provided                                                               |
| 28                                                       | MI, ACS, Stroke, HF, CVD death, Death, AKI | Hypotension, Syncope, Bradycardia, ELYTE, fall, OHYPO-SX, OHYPO-ASX, Albuminuria | -                                       | 22                                          | 3.3                                  |                                          |                                           |                                        |                                         |                                         |                                       |                                                       | Color coding to differentiate difference between treatments, 5 levels                                |
| 16                                                       | SPRINT composite outcome                   | -                                                                                | -                                       | 8                                           | 5                                    | 2.76                                     | 2.1                                       |                                        |                                         | 0.67                                    |                                       |                                                       | iNNT>100 - Low benefit group                                                                         |

| Risk Calculation from Clinical Scores Developed |                          |                                                                  |                                       |                                             |                                      |               |            |                                 |                                                   |                                                 |                                                        |                                                                                                      |
|-------------------------------------------------|--------------------------|------------------------------------------------------------------|---------------------------------------|---------------------------------------------|--------------------------------------|---------------|------------|---------------------------------|---------------------------------------------------|-------------------------------------------------|--------------------------------------------------------|------------------------------------------------------------------------------------------------------|
| ID                                              | Efficacy Outcome         | Safety Outcome                                                   | Efficacy and Safety Outcomes Combined | No. of Variables Used to Calculate the Risk | Time When Risk Calculated (in years) | Benefit Score | Harm Score | Benefit and Harm Combined Score | ARR of Efficacy Outcome (Standard - Intensive, %) | ARI of Safety Outcome (Intensive - Standard, %) | Net Benefit (Benefit -Harm) from Intensive Therapy (%) | Interpretation/Recommendation for Intensive Therapy (Based on cutoff provided or NNH/NNT calculated) |
| 7                                               | SPRINT composite outcome | Composite of Hypotension, Syncope, Bradycardia, ELYTE, fall, AKI | -                                     | 9                                           | 3.3                                  |               |            | 4                               | 2                                                 | 2                                               | 0                                                      | Recommend Intensive Therapy                                                                          |
| 27                                              | SPRINT composite outcome | Composite of Hypotension, Syncope, ELYTE, fall, AKI              | -                                     | 9 for Efficacy/7 for Safety                 | Not Specified                        | 5             | 4          |                                 | -3                                                |                                                 |                                                        | Recommend Intensive Therapy                                                                          |
| 23                                              | SPRINT composite outcome | Composite of Hypotension, Syncope, Bradycardia, ELYTE, fall, AKI | -                                     | 9                                           | 3.3                                  |               |            | quartile 2                      | 1.29                                              | 1.62                                            |                                                        | Low benefit group. No specific recommendations.                                                      |

| Risk Category Classified from the Submission |                          |                  |                                             |                                                     |                                      |                                          |                                           |                                        |                                         |                                         |                                       |                                                                              |                                                                                    |
|----------------------------------------------|--------------------------|------------------|---------------------------------------------|-----------------------------------------------------|--------------------------------------|------------------------------------------|-------------------------------------------|----------------------------------------|-----------------------------------------|-----------------------------------------|---------------------------------------|------------------------------------------------------------------------------|------------------------------------------------------------------------------------|
| ID                                           | Efficacy Outcome         | Safety Outcome   | No. of Variables Used to Calculate the Risk | Name the Variables Used to Categorize the Risk      | Time When Risk Calculated (in years) | AR of Efficacy from Standard Therapy (%) | AR of Efficacy from Intensive Therapy (%) | AR of Safety from Standard Therapy (%) | AR of Safety from Intensive Therapy (%) | ARR of Efficacy (Standard-Intensive, %) | ARI of Safety (Intensive-Standard, %) | HR of Outcome (Intensive vs. Standard)                                       | Interpretation/Recommendation for Intensive Therapy (HR of Intensive vs. Standard) |
| 14                                           | -                        | Hypotension, AKI | 3                                           | Framingham score, kidney disease, total cholesterol | Not Specified                        |                                          |                                           | Hypotension (3%), kidney disease (5%)  | Hypotension (4%), kidney disease (7%)   |                                         |                                       | HR benefit = 0.74; HR Safety = 1.28 for hypotension, 1.46 for Kidney Disease | Subgroup 1 (Low Harm, Benefit)                                                     |
| 15                                           | SPRINT composite outcome | -                | 3                                           | clinical CVD, age, ascvd risk                       | Not Specified                        | 13.1                                     | 11.6                                      | 3.5                                    | 6.4                                     | 1.5                                     | 3                                     |                                                                              | Group D (High CV Risk but No Benefit)                                              |
| 17                                           | SPRINT composite outcome | -                | 3                                           |                                                     | Not Specified                        |                                          |                                           |                                        |                                         |                                         |                                       | HR of benefit = 0.66                                                         | High risk                                                                          |

## Case 2 – Low CV Risk Patient

| Risk Calculation from Web/App Tools or Equation Provided |                                            |                |                                         |                                             |                                      |                                          |                                           |                                        |                                         |                                           |                                         |                                                       |                                                                                                      |
|----------------------------------------------------------|--------------------------------------------|----------------|-----------------------------------------|---------------------------------------------|--------------------------------------|------------------------------------------|-------------------------------------------|----------------------------------------|-----------------------------------------|-------------------------------------------|-----------------------------------------|-------------------------------------------------------|------------------------------------------------------------------------------------------------------|
| ID                                                       | Efficacy Outcome                           | Safety Outcome | Efficacy and Safety Outcomes Combined   | No. of Variables Used to Calculate the Risk | Time When Risk Calculated (in years) | AR of Efficacy from Standard Therapy (%) | AR of Efficacy from Intensive Therapy (%) | AR of Safety from Standard Therapy (%) | AR of Safety from Intensive Therapy (%) | ARR of Efficacy (Standard - Intensive, %) | ARI of Safety (Intensive - Standard, %) | Net Benefit (Benefit-Harm) from Intensive Therapy (%) | Interpretation/Recommendation for Intensive Therapy (Based on cutoff provided or NNH/NNT calculated) |
| 6                                                        | -                                          | -              | Assume composite SPRINT and SAE outcome | 5                                           | Not Specified                        | 0.06                                     | 0.07                                      | 0.53                                   | 0.79                                    |                                           |                                         |                                                       | No specific recommendation is provided                                                               |
| 28                                                       | MI, ACS, Stroke, HF, CVD death, Death, AKI | Same as above  | -                                       | 22                                          | 3.3                                  |                                          |                                           |                                        |                                         |                                           |                                         |                                                       | Color coding to differentiate difference between treatments, 5 levels                                |
| 16                                                       | SPRINT composite outcome                   | -              | -                                       | 8                                           | 5                                    | 0.99                                     | 0.75                                      |                                        |                                         | 0.24                                      |                                         |                                                       | iNNT>100 - Low benefit group                                                                         |

| Risk Calculation from Clinical Scores Developed |                          |                                                                  |                                       |                                             |                                      |               |            |                                 |                                                   |                                                 |                                                       |                                                                                                      |
|-------------------------------------------------|--------------------------|------------------------------------------------------------------|---------------------------------------|---------------------------------------------|--------------------------------------|---------------|------------|---------------------------------|---------------------------------------------------|-------------------------------------------------|-------------------------------------------------------|------------------------------------------------------------------------------------------------------|
| ID                                              | Efficacy Outcome         | Safety Outcome                                                   | Efficacy and Safety Outcomes Combined | No. of Variables Used to Calculate the Risk | Time When Risk Calculated (in years) | Benefit Score | Harm Score | Benefit and Harm Combined Score | ARR of Efficacy Outcome (Standard - Intensive, %) | ARI of Safety Outcome (Intensive - Standard, %) | Net Benefit (Benefit-Harm) from Intensive Therapy (%) | Interpretation/Recommendation for Intensive Therapy (Based on cutoff provided or NNH/NNT calculated) |
| 7                                               | SPRINT composite outcome | Composite of Hypotension, Syncope, Bradycardia, ELYTE, fall, AKI | -                                     | 9                                           | 3.3                                  |               |            | 0                               | 2                                                 | 3.5                                             | -1.5                                                  | Recommend Standard Therapy                                                                           |
| 27                                              | SPRINT composite outcome | Composite of Hypotension, Syncope, ELYTE, fall, AKI              | -                                     |                                             | Not Specified                        | 0             | 0          |                                 | -0.5                                              |                                                 |                                                       | Recommend Standard Therapy                                                                           |
| 23                                              | SPRINT composite outcome | Composite of Hypotension, Syncope, Bradycardia, ELYTE, fall, AKI | -                                     | 9                                           | 3.3                                  |               |            | quartile 1                      | 0.82                                              | 0.97                                            |                                                       | Low benefit group. No specific recommendations.                                                      |



| Risk Category Classified from the Submission |                          |                  |                                             |                                                     |                                      |                                          |                                           |                                        |                                         |                                           |                                         |                                                                              |                                                                                    |
|----------------------------------------------|--------------------------|------------------|---------------------------------------------|-----------------------------------------------------|--------------------------------------|------------------------------------------|-------------------------------------------|----------------------------------------|-----------------------------------------|-------------------------------------------|-----------------------------------------|------------------------------------------------------------------------------|------------------------------------------------------------------------------------|
| ID                                           | Efficacy Outcome         | Safety Outcome   | No. of Variables Used to Calculate the Risk | Name the Variables Used to Categorize the Risk      | Time When Risk Calculated (in years) | AR of Efficacy from Standard Therapy (%) | AR of Efficacy from Intensive Therapy (%) | AR of Safety from Standard Therapy (%) | AR of Safety from Intensive Therapy (%) | ARR of Efficacy (Standard - Intensive, %) | ARI of Safety (Intensive - Standard, %) | HR of Outcome (Intensive vs. Standard)                                       | Interpretation/Recommendation for Intensive Therapy (HR of Intensive vs. Standard) |
| 14                                           | -                        | Hypotension, AKI | 3                                           | Framingham score, kidney disease, total cholesterol | Not Specified                        |                                          |                                           | Hypotension (3%), kidney disease (5%)  | Hypotension (4%), kidney disease (7%)   |                                           |                                         | HR benefit = 0.74; HR Safety = 1.28 for hypotension, 1.46 for Kidney Disease | Subgroup 1 (Low Harm, Benefit)                                                     |
| 15                                           | SPRINT composite outcome | -                | 3                                           | clinical CVD, age, ascvd risk                       | Not Specified                        | 2.8                                      | 1.9                                       | 1.2                                    | 2.2                                     | 0.9                                       | 1                                       |                                                                              | Group A (Low CV risk but higher Benefit)                                           |
| 17                                           | SPRINT composite outcome | -                | 3                                           |                                                     | Not Specified                        |                                          |                                           |                                        |                                         |                                           |                                         | HR of benefit = 0.83                                                         | Low risk                                                                           |

AR=absolute risk; ARR=absolute risk reduction; ARI=absolute risk increase; NNH=number needed to harm; NNT=number needed to treat;

SAE=serious adverse events; MI=myocardial infarction; ACS=acute coronary syndrome; HF=heart failure; CVD=cardiovascular diseases;

ELYTE=Electrolyte abnormality, fall=Injurious fall, OHYPO-SX=Orthostatic Hypotension with dizziness, OHYPO-ASX= Orthostatic hypotension

without dizziness, AKI=acute kidney injury; ASCVD=Atherosclerotic Cardiovascular Disease;
